# Supplementary material for: Modulation of N-bonding configurations and their influence on the electrical properties of nitrogen-doped graphene
Source: Royal Society of Chemistry journal article supplement (doi:10.1039/c6ra19278e), 2016-01-01
Supplement: c6ra19278e1.pdf [file c6ra19278e1.pdf]

## Supporting information

### **Modulation of N-bonding configurations and its influence on the electrical properties of nitrogen-doped graphene**

Zegao Wang,<sup>abc</sup> Yuanfu Chen,<sup>\*a</sup> Pingjian Li,<sup>\*a</sup> Jinhao Zhou,<sup>a</sup> Jiarui He,<sup>a</sup> Wanli Zhang,<sup>a</sup> Zheng Guo,<sup>c</sup> Yanrong Li,<sup>a</sup> and Mingdong Dong<sup>b</sup>

<sup>a</sup>State Key Laboratory of Electronic Thin Films and Integrated Devices, University of Electronic Science and Technology of China, Chengdu 610054, P. R. China. E-mail: [yfchen@uestc.edu.cn](mailto:yfchen@uestc.edu.cn); [lipingjian@uestc.edu.cn](mailto:lipingjian@uestc.edu.cn)

<sup>b</sup>Interdisciplinary Nanoscience Center (iNANO), Aarhus University, DK-8000 Aarhus C, Denmark

<sup>c</sup>Department of Engineering, Aarhus University, DK-8000 Aarhus C, Denmark

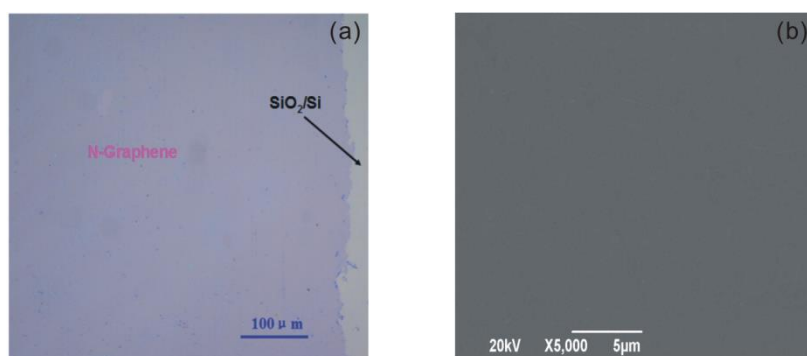

Figure S1. Optical and SEM images of nitrogen doped graphene after transferring on SiO<sub>2</sub>/Si substrate.
